# Supplementary material
Source: Copernicus journal article supplement (doi:10.5194/egusphere-2024-2259)
Supplement: Supplementary file 2 [file DustNet___GMD_Supplementary_materials.pdf › supplementary_materials/DustNet___GMD_Supplementary_materials.pdf]

## Supplementary Materials

### DustNet (v1): Skillful neural network predictions of dust aerosols over the Saharan Desert

Trish E. Nowak<sup>1,3</sup>, Andy T. Augousti<sup>2</sup>, Benno I. Simmons<sup>3,\*</sup>, and Stefan Siebert<sup>1,\*</sup>

<sup>1</sup>Mathematics and Statistics, University of Exeter, Exeter, EX4 QH, UK

<sup>2</sup>Department of Mechanical Engineering, Kingston University, London, SW15 3DW, UK

<sup>3</sup>Centre for Ecology and Conservation, University of Exeter, Penryn, TR10 9FE, UK

\*These authors should be considered joint last author.

**Correspondence:** Trish E. Nowak (pn284@exeter.ac.uk) and Stefan Siebert (s.siebert@exeter.ac.uk)

**Abstract.** Suspended in the atmosphere are millions of tonnes of mineral dust that interact with weather and climate. Accurate representation of mineral dust in weather models is vital, yet it remains challenging. Large-scale weather models use high-power supercomputers and take hours to complete forecasts. Such computational burdens allow them to include only monthly climatological means of mineral dust as input states, inhibiting their forecasting accuracy. Here, we introduce DustNet, a simple, accurate, and super-fast forecasting model for 24-hour (1-step) ahead predictions of aerosol optical depth (AOD). DustNet is a custom-built 2-D Convolutional Neural Network (CNN) equipped with transposed convolution layers. The model is trained on selected ERA5 meteorology and past MODIS-AOD observational data as inputs. Our design of DustNet ensures that the model trains in less than 8 minutes and creates predictions in 2.1 seconds on a desktop computer, without the need to utilize any Graphics Processing Units (GPUs). Predictions created by DustNet outperform the state-of-the-art physics-based model at coarse  $1^\circ \times 1^\circ$  resolution at 95% of grid locations when compared to ground truth satellite data. The test results show that the daily mean AOD over the entire area highly correlates with MODIS observational data, with Pearson's  $r^2 = 0.91$ . Our results demonstrate DustNet's potential for fast and accurate AOD forecasting, which can easily be utilized by researchers without access to supercomputers or GPUs.

*Copyright statement.* For the purpose of open access, the author has applied a 'Creative Commons Attribution (CC BY) licence to any

Author Accepted Manuscript version arising from this submission.

S1 Supplements for Methods section

S1.1 AOD imputation

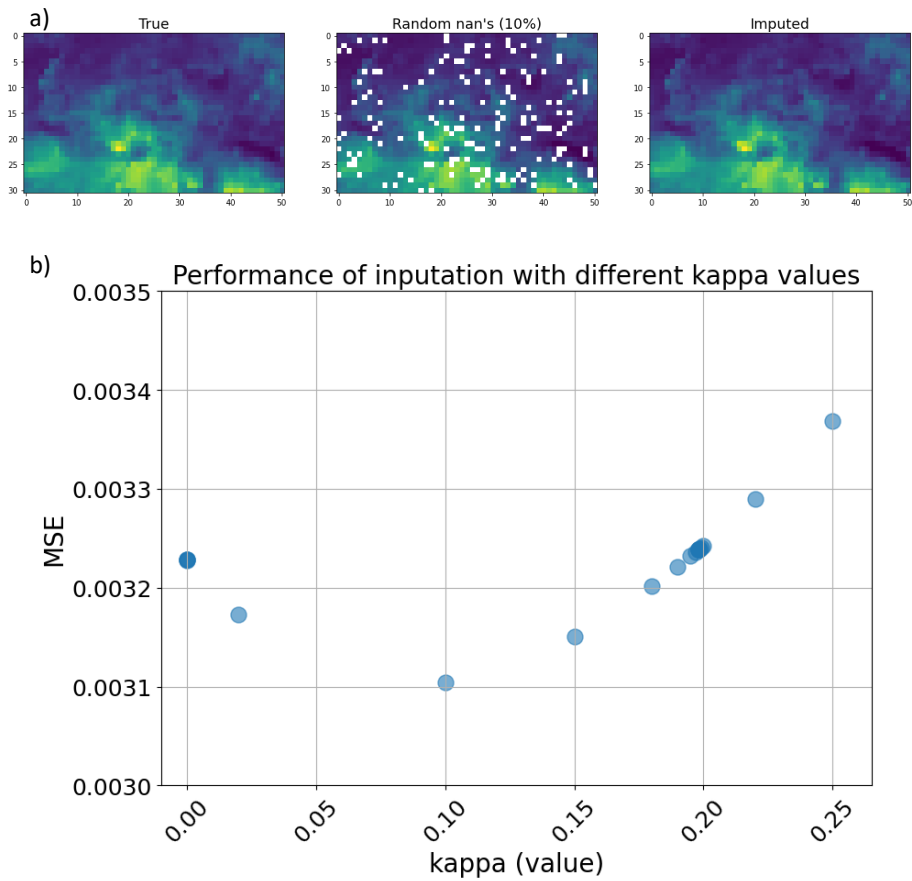

**Figure S1.** Performance validation of imputation code. Three visual inspections of imputation in **a)** show the "true" values on the left, randomly assigned 10% of missing values in the middle, and imputed with Lattice Kriging method values in the right panel. In **b)** the results of MSEs between "true" and imputed values are displayed for different kappa values (Kriging hyperparameter) used during imputation. We tested 24 different kappa values ranging between 0.000001 and 0.1998. The MSE appears to be insensitive to changes in kappa values producing only marginal improvements in the overall MSE.

## S1.2 DustNet - training *versus* validation

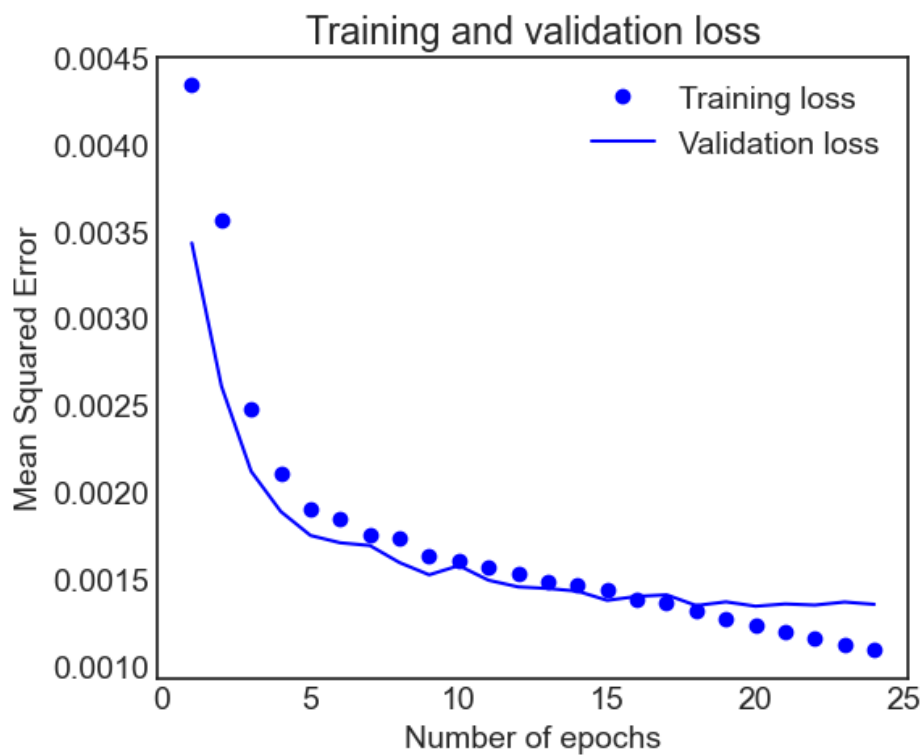

**Figure S2.** Training and validation loss for the optimal model - DustNet. The model's architecture ensures Early Stopping is performed following the 4th iteration without any improvement in validation loss. Here, stopping occurred after 24 epochs and the model with the lowest ratio of training to validation loss was saved and used for predictions.

### S1.3 Daily AOD from MODIS *versus* DustNet predictions - visual inspection

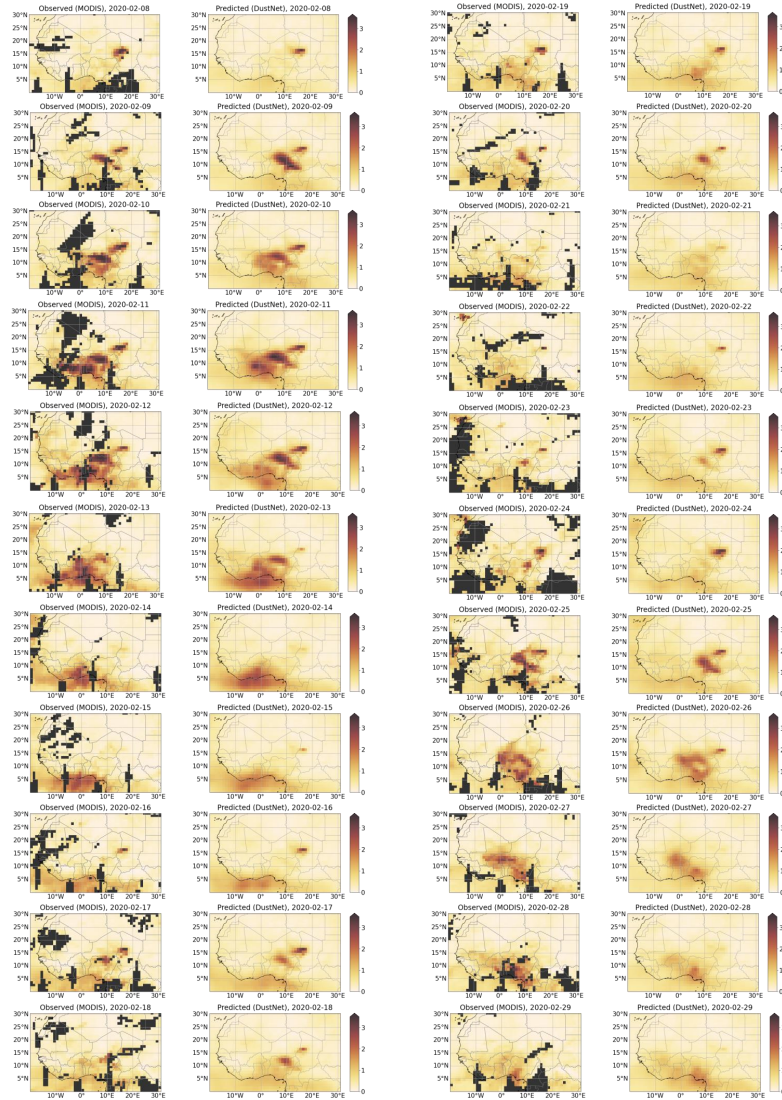

**Figure S3.** Visual comparison of daily AOD values as observed by MODIS (mean of Aqua and Terra) (**left panel** in both columns) and corresponding DustNet predictions (**right panel**) for selected continuous 3 weeks (22 days), from 8th - 29th February 2020. The dark grey colour in the MODIS maps represents missing values. Despite an initial assumption of heavy reliance on the past 5 days of AOD during training, DustNet presents a skillful ability to predict the next time-step (24-hr) which visibly differs from the last 5 days. This is evident on 13th -14th Feb and 21st Feb, where the AOD values start to decrease despite an increasing past trend. Similarly, prediction of an increasing AOD from 22nd - 26th Feb was captured, despite the previous 5 days of decreasing AOD. The south-western direction of aerosol transport during boreal winter is also skillfully captured (10th - 14th Feb), as is the position of the Bodélé Depression during dust generation episodes (22nd - 26th Feb), but without overly relying on this location as a constant dust source (27th - 29th Feb).

S2.1 Density curves of daily mean AOD predictions

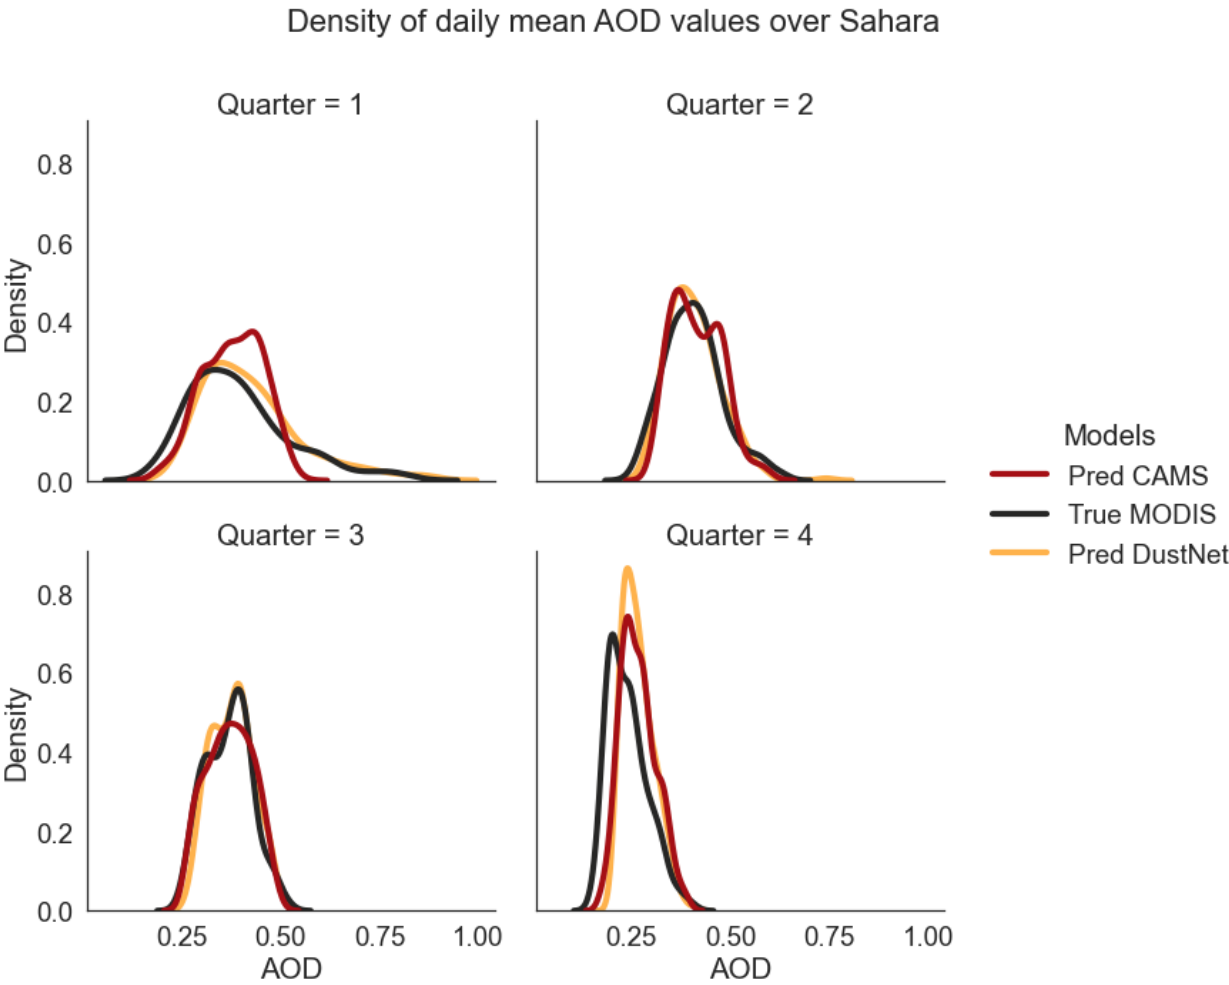

**Figure S4.** Seasonal mean distribution of daily predicted and true AOD values. The data was averaged over the study region for the testing period of 2020-2022, and shows CAMS forecasts (red) DustNet predictions (yellow) and ground-true MODIS (black). The long tail, indicative of higher AOD values, is clearly missing in the CAMS distribution (red) for Quarter 1: January - March, while the lower AOD values are overestimated. The opposite is true for Quarter 4: October - December, where lower AOD values tend to be underestimated by both CAMS and DustNet in comparison to MODIS. Both models forecast fairly well during Quarter 2 and 3, although DustNet captures the bimodal distribution of AOD in Quarter 3 more skillfully than CAMS.

S2.2 Feature importance

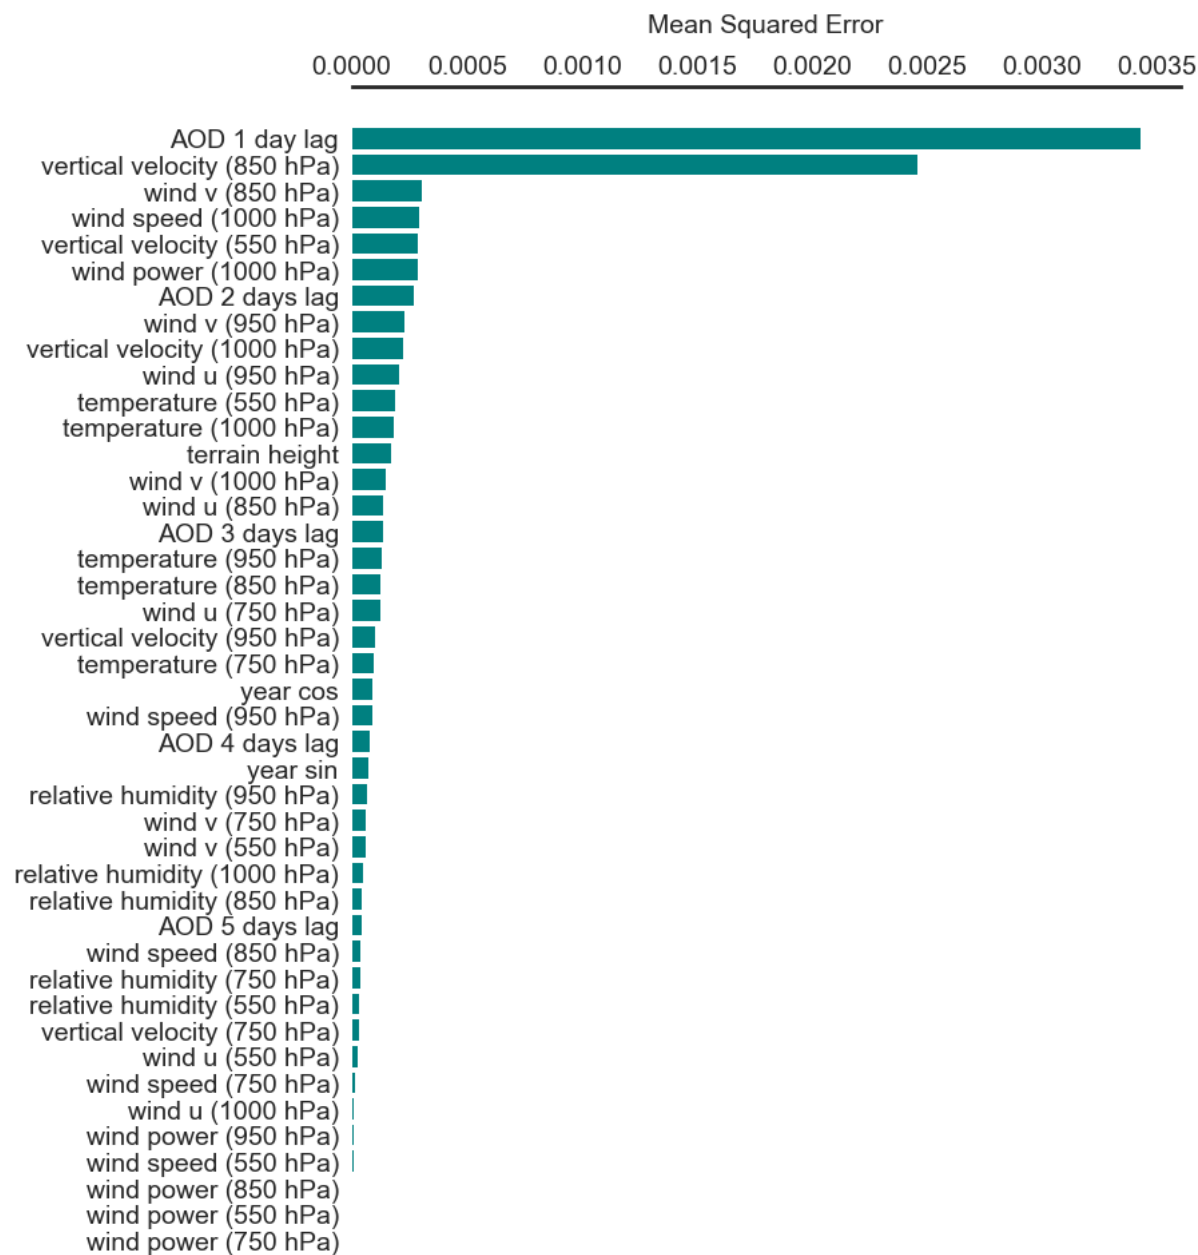

**Figure S5.** Feature importance analysis for all features included in the DustNet model based on Mean Squared Error (MSE). Features with the highest MSE indicate the highest relevance to the model predictions, while features with the lowest MSE are deemed as nearly irrelevant.

*Author contributions.* Conceptualization: T.E.N., S.S., B.I.S., A.T.A. Methodology: T.E.N., S.S. Investigation: T.E.N. Visualization: T.E.N. Supervision: S.S., B.I.S., A.T.A. Writing—original draft: T.E.N. Writing—review and editing: T.E.N., S.S., B.I.S., A.T.A.

25 *Competing interests.* The authors declare no competing interests.

*Acknowledgements.* This work was supported by the UKRI Centre for Doctoral Training in Environmental Intelligence, Engineering and Physical Sciences Research Council Grant Reference: EP/S022074/1. We acknowledge NASA for producing, maintaining and releasing the MODIS AOD data which was used for training and comparison in this study. For these same reasons we acknowledge Copernicus Atmospheric Monitoring Service and ECMWF for their open release of CAMS AOD forecasts data. We would also like to acknowledge  
30 the reviewers of this paper: the Anonymous Referee #1 and Prof Narendra Ojha – Referee #2, whose comments contributed to better communication of our results and an overall improvement of this paper.
