# Supplementary material
Source: Copernicus journal article supplement (doi:10.5194/egusphere-2024-2259)

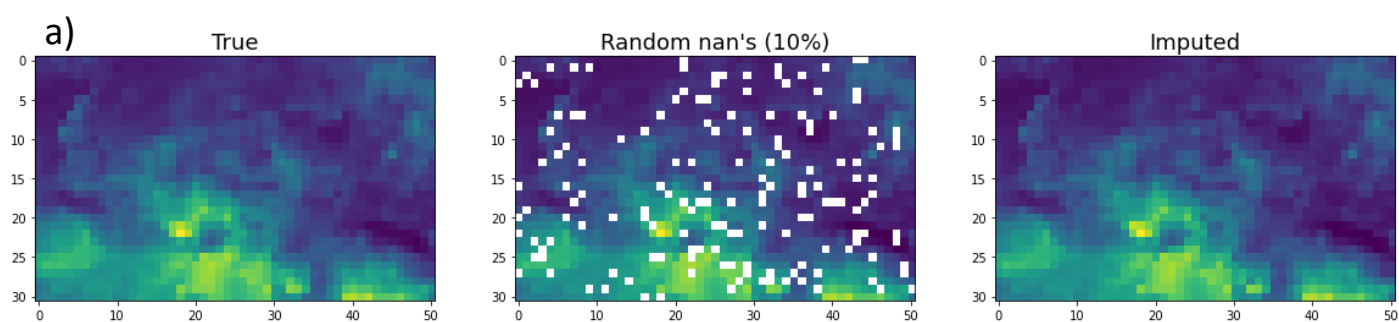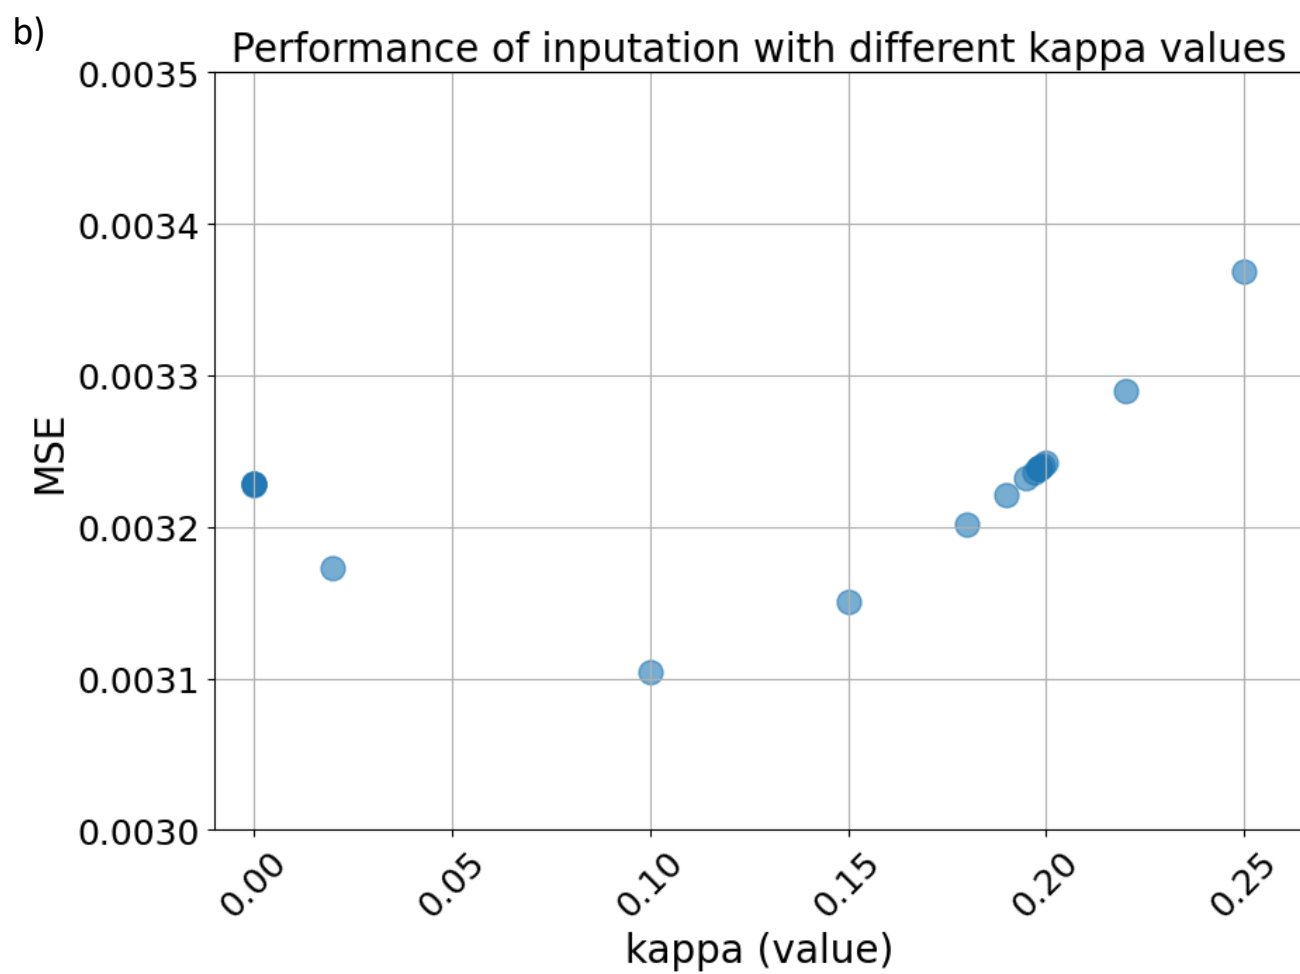

Supplement: Supplementary file 3 [file fS1.pdf › supplementary_materials/fS1.pdf]

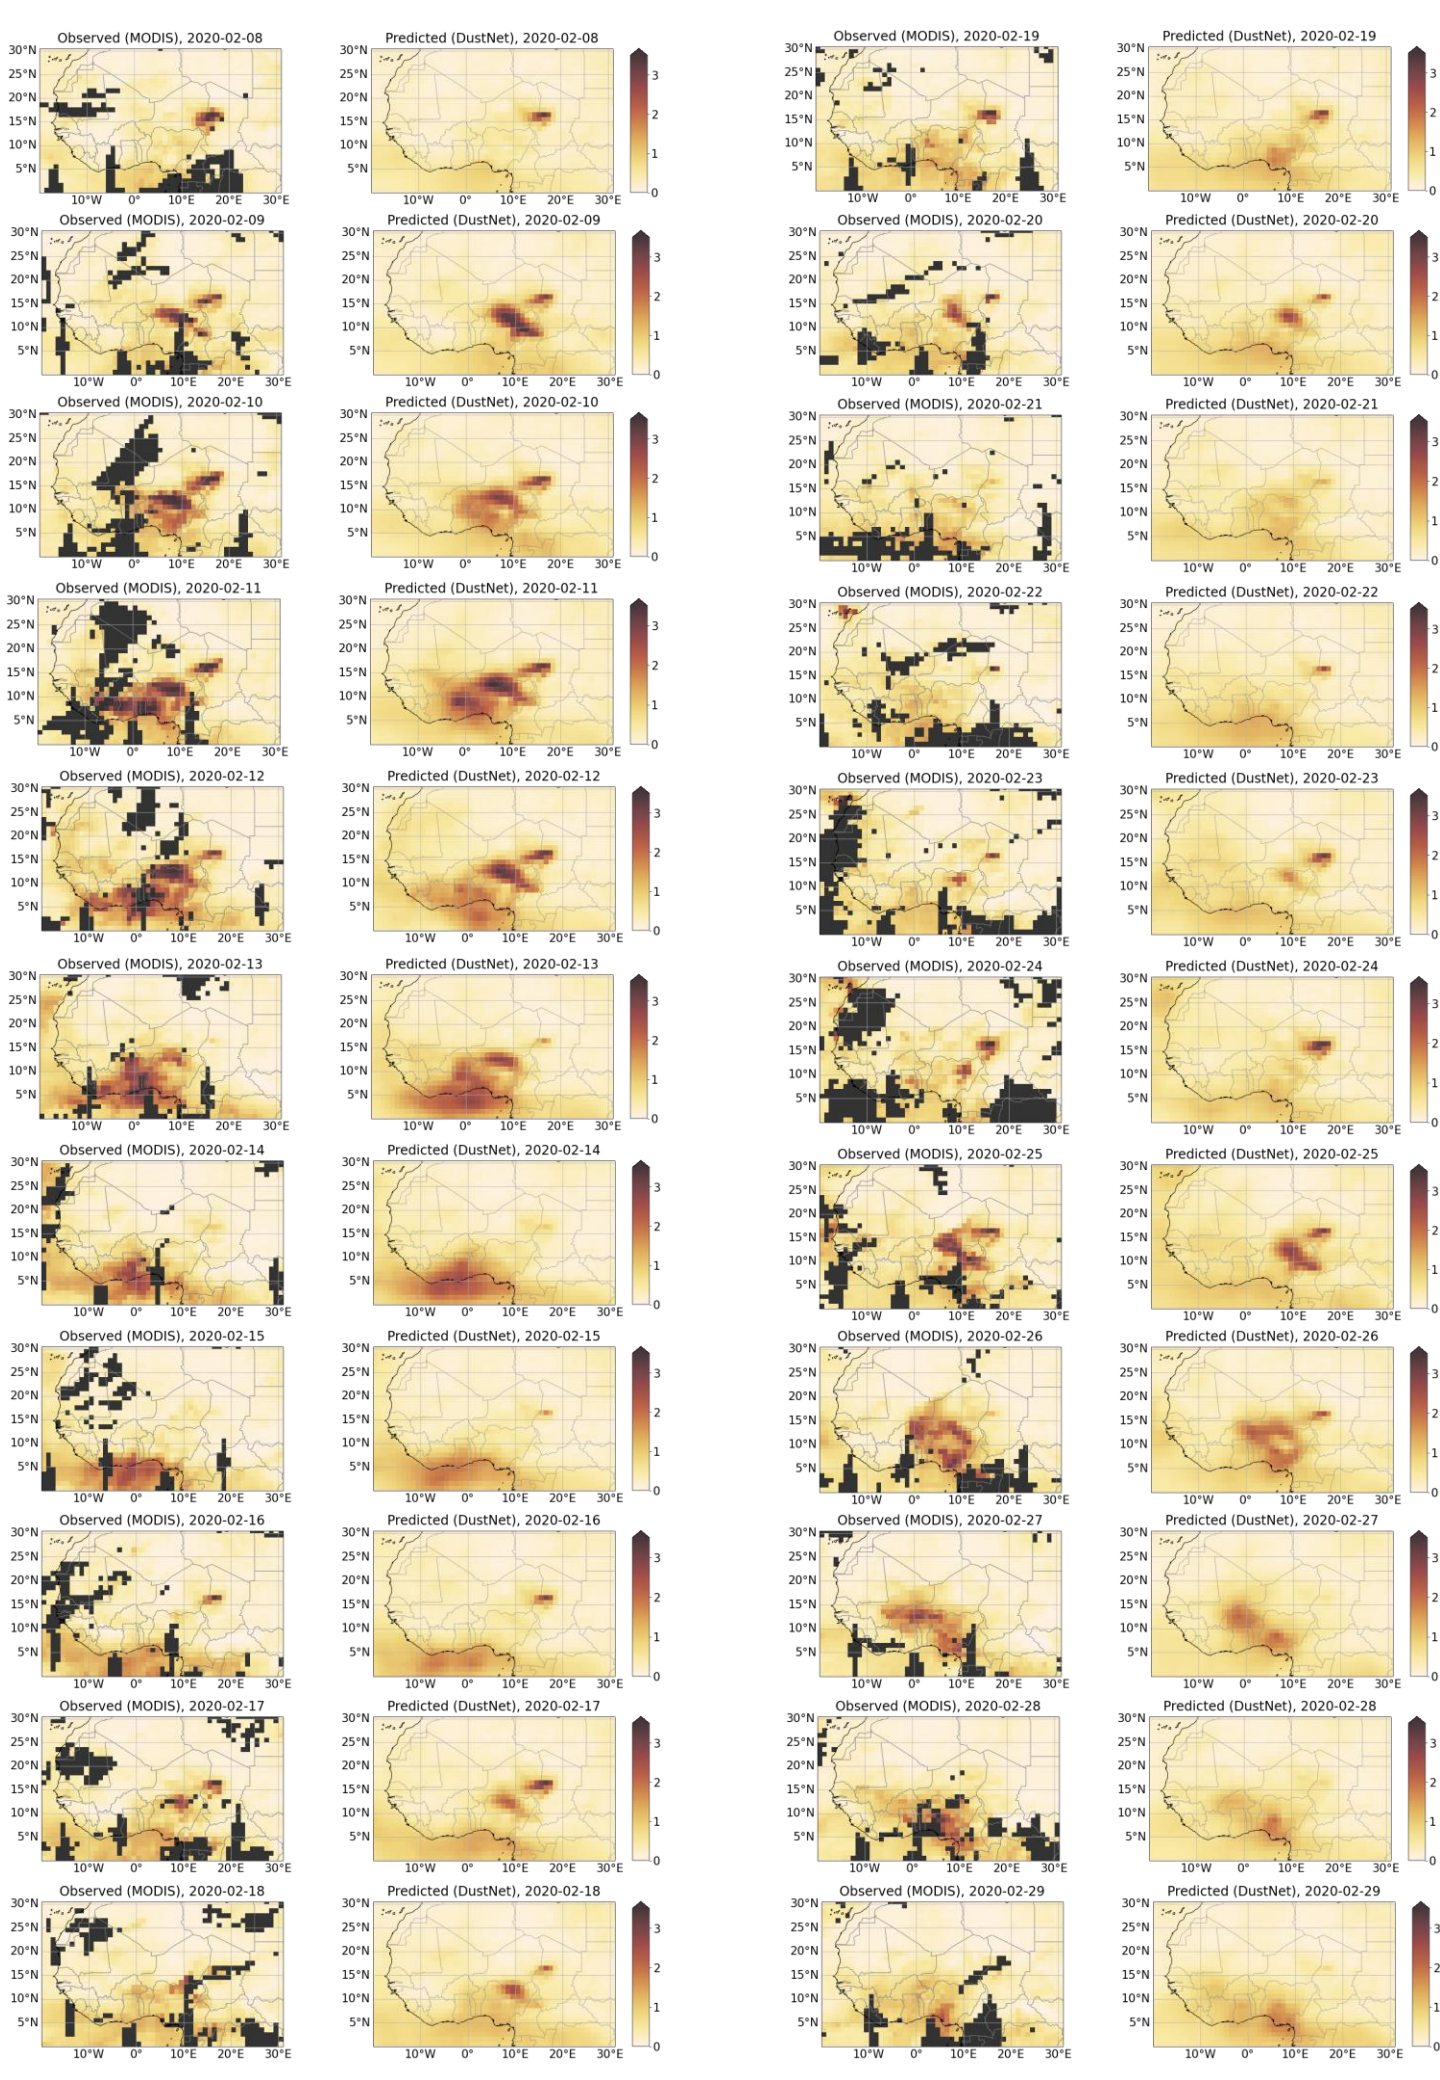

Supplement: Supplementary file 4 [file fS3.pdf › supplementary_materials/fS3.pdf]

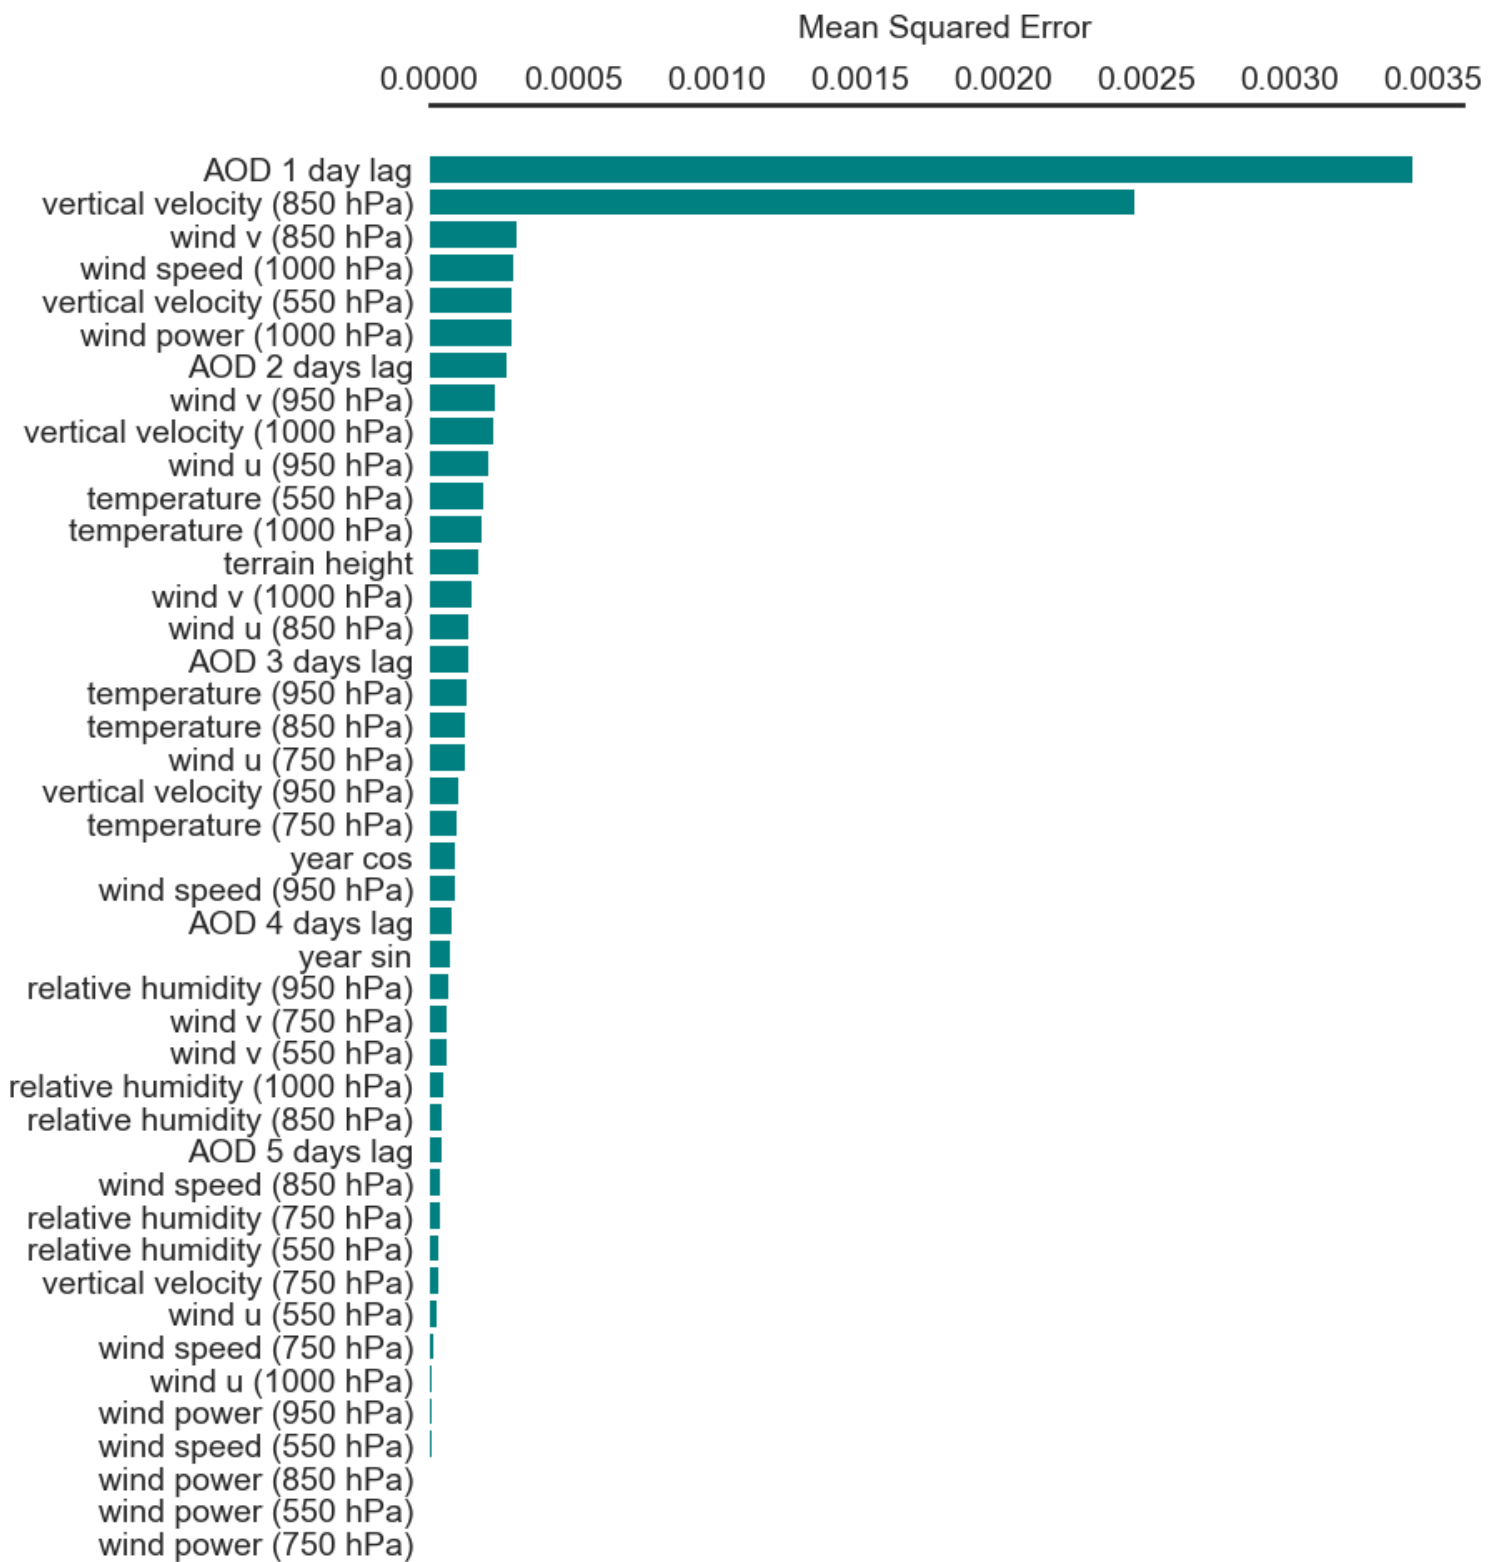

Feature importance based on MSE

Supplement: Supplementary file 5 [file fS5.pdf › supplementary_materials/fS5.pdf]
